# Supplementary material for: Efficient light-driven hydrogen evolution and azo dye degradation over the GdVO4@g-C3N4 heterostructure
Source: Royal Society of Chemistry journal article supplement (doi:10.1039/d3ra02949b), 2023-01-01
Supplement: d3ra02949b1.pdf [file d3ra02949b1.pdf]

## Efficient Light Driven Hydrogen Evolution and Azo Dyes Degradation over GdVO<sub>4</sub>@g-C<sub>3</sub>N<sub>4</sub> Heterostructure

Fahad A Alharthi\*, Adel El Marghany, Naaser A. Y. Abduh, Imran Hasan\*

*Department of Chemistry, College of Science, King Saud University, Riyadh-11451, KSA*

Email: [fharthi@ksu.edu.sa](mailto:fharthi@ksu.edu.sa)

Email: [amarghany@ksu.edu.sa](mailto:amarghany@ksu.edu.sa)

Email: [439106262@student.ksu.edu.sa](mailto:439106262@student.ksu.edu.sa)

Email: [iabdulateef@ksu.edu.sa](mailto:iabdulateef@ksu.edu.sa)      Contact: +966-507976713

### Corresponding authors

Imran Hasan (I.H.) Email: [iabdulateef@ksu.edu.sa](mailto:iabdulateef@ksu.edu.sa)      Contact: +966-507976713

Fahad A Alharthi (F.A.A.) Email: [fharthi@ksu.edu.sa](mailto:fharthi@ksu.edu.sa)

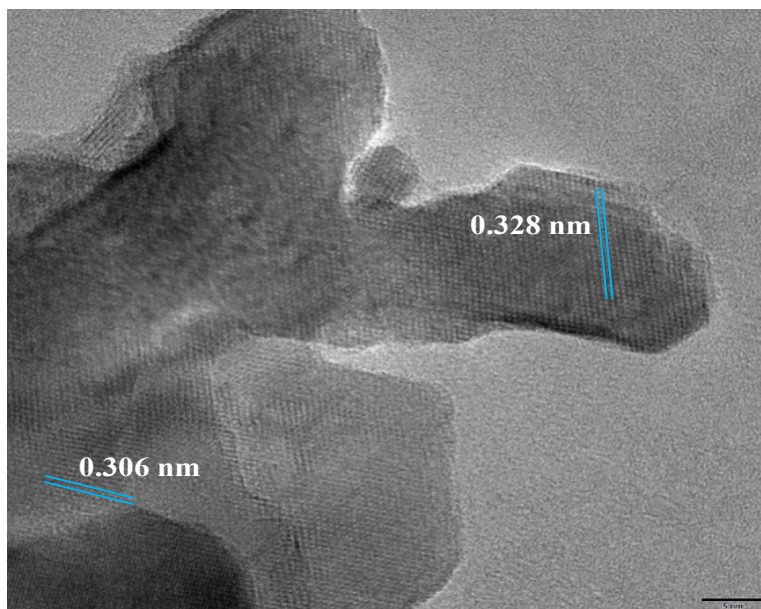

Fig. S1 HRTEM of CN/GdV heterostructure

The HR-TEM image (Fig. S1) reveals a close interface formed between two phases of CN and GdV. Consistent with the XRD, the detected lattice fringes of  $d = 0.328$  nm, and  $d = 0.306$  nm, correspond to the (211) crystallographic planes of GdV and (002) crystallographic plane of CN, respectively. Furthermore, this strong interaction facilitates rapid charge transfer after visible light excitation, which boosts the photocatalytic activity.

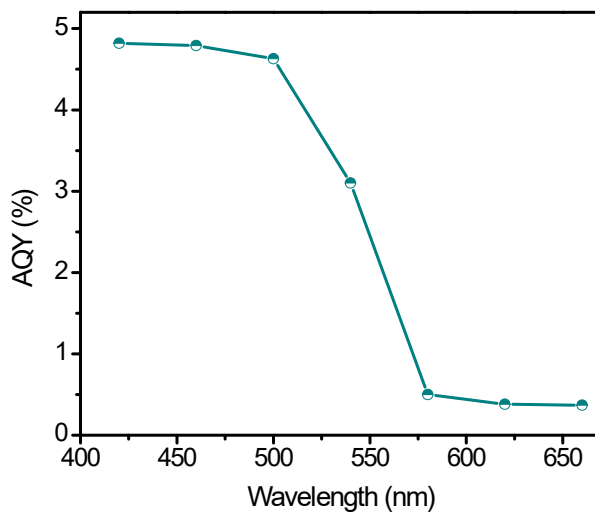

Fig S2: AQY of H<sub>2</sub> evolution in presence of CN/GdV

Fig. S2 shows the Apparent quantum yield (AQY) of H<sub>2</sub> evolution in presence of CN/GdV. AQY was determined using a 420 nm band pass filter and calculated using the formula;

$$\text{AQY (\%)} = 2 \times \frac{\text{The number of H}_2 \text{ evolved}}{\text{The number of incident photons}} \times 100$$

The AQY of CN/GdV is found to 4.82 % and shows good efficiency towards the absorption of light under visible region.

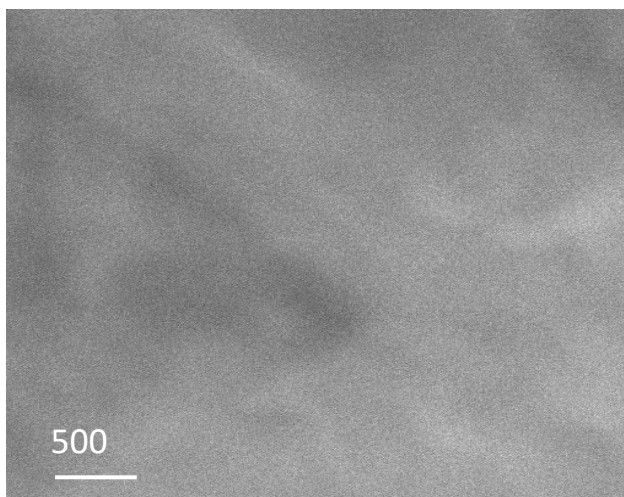

Fig. S3. SEM monograph of CN/GdV after 5 cycles of photocatalytic degradation of AMR.

Fig. S3 displays the results of SEM looking at the morphology of the CN/GdV photocatalyst before and after the 5 cycles of photocatalytic dye degradation activity. Once the photocatalyst's pore structure is destroyed, it begins to resemble clumps of particles that have begun to agglomerate. This shows the moderate stability of the CN/GdV after some cycles.
